# Supplementary material
Source: PubMed Central journal article supplement (PMC2938165)
Supplement: pp.110.161042_1.pdf [file pp.110.161042_1.pdf]

**A**

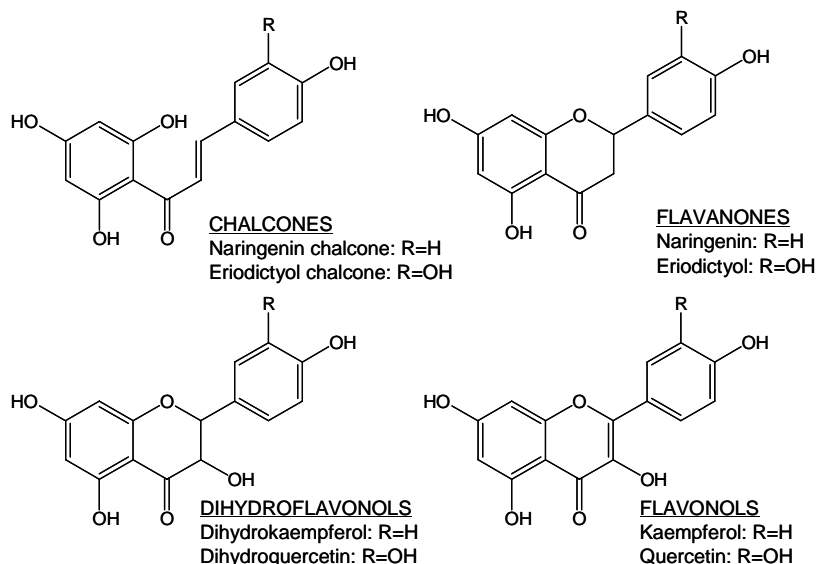

| SUBSTRATES           | ENZYME ACTIVITY |
|----------------------|-----------------|
| Naringenin chalcone  | N.D.            |
| Eriodictyol chalcone | N.D.            |
| Naringenin           | 38.1 ± 0.6      |
| Eriodictyol          | 50.7 ± 0.3      |
| Dihydrokaempferol    | N.D.            |
| Dihydroquercetin     | N.D.            |
| Kaempferol           | N.D.            |
| Quercetin            | N.D.            |

**B**

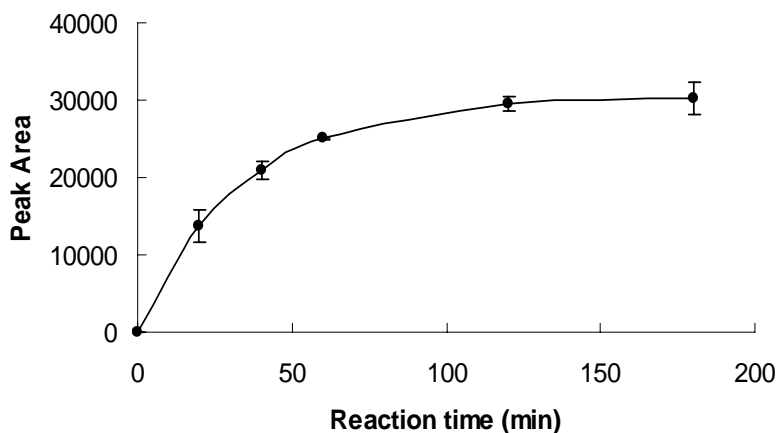

**Fig. S1.** A. Enzyme activities of CYP93G2-expressing yeast microsomes toward different flavonoid substrates. Data are mean ± SD of triplicate measurements and expressed in nmol product min<sup>-1</sup> mg protein<sup>-1</sup>. N.D. = not detected. B. Production of 2-hydroxyeriodictyol from eriodictyol in reactions catalyzed by CYP93G2-expressing yeast microsomes.

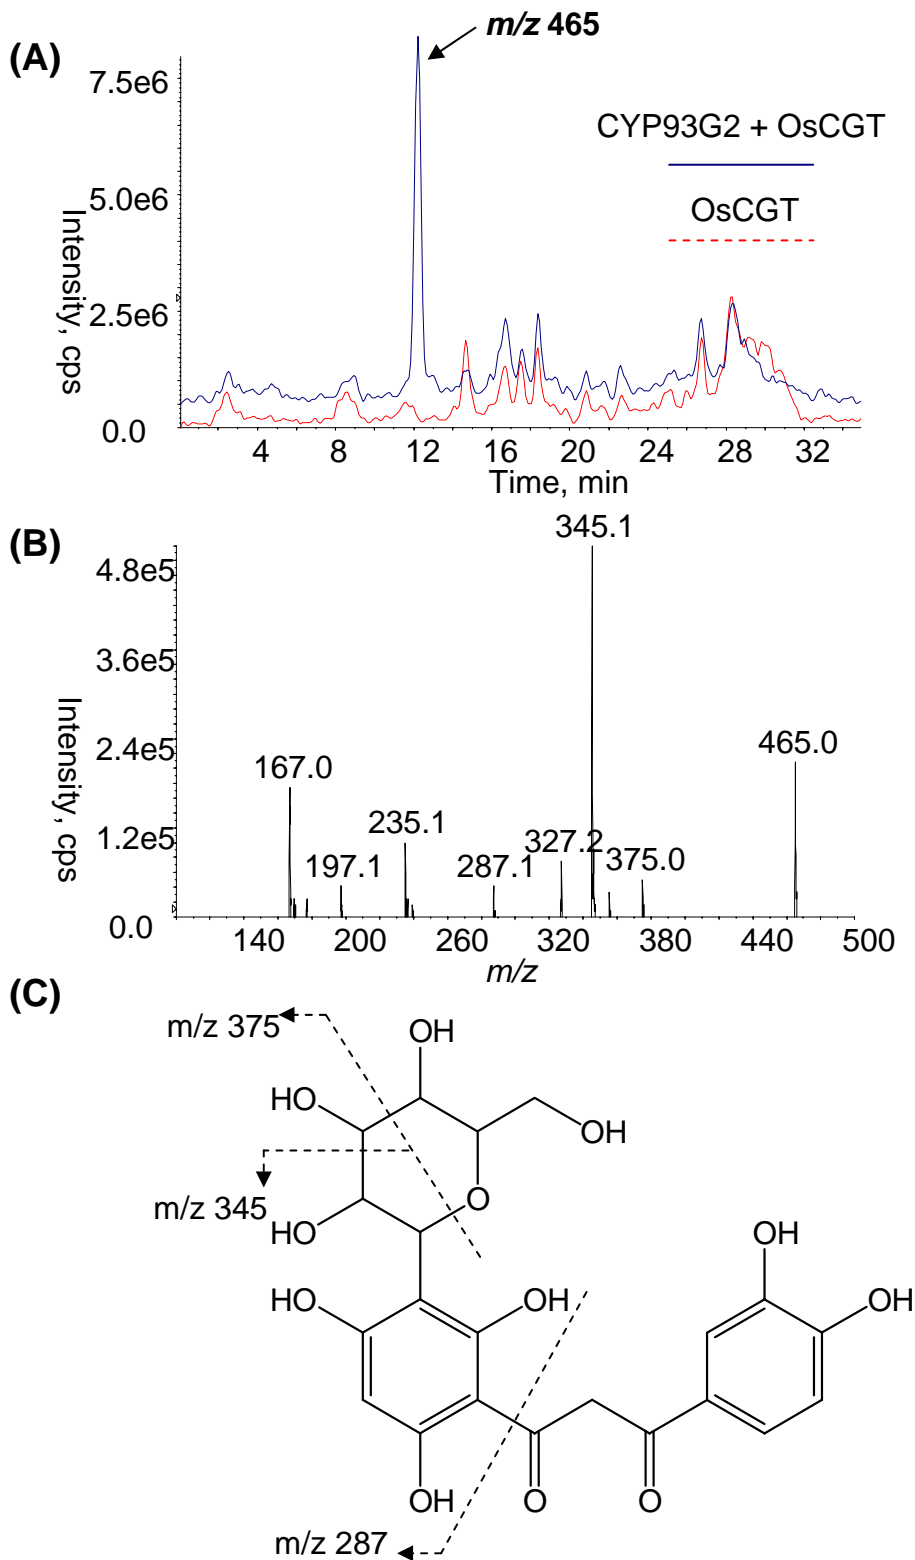

**Fig S2.** Accumulation of C-glucosyl-2-hydroxyneriodictyol in transgenic *Arabidopsis* co-expressing CYP93G2 and OsCGT. (A) Detection of a distinct peak producing a  $[M-H]^-$  ion at  $m/z$  465 in the double transformant sample. (B) MS/MS spectrum of the  $m/z$  465 ion revealed the fragmentation pattern consistent with that reported for C-glucosyl-2-hydroxyflavanone in the open chain form as shown in (C).

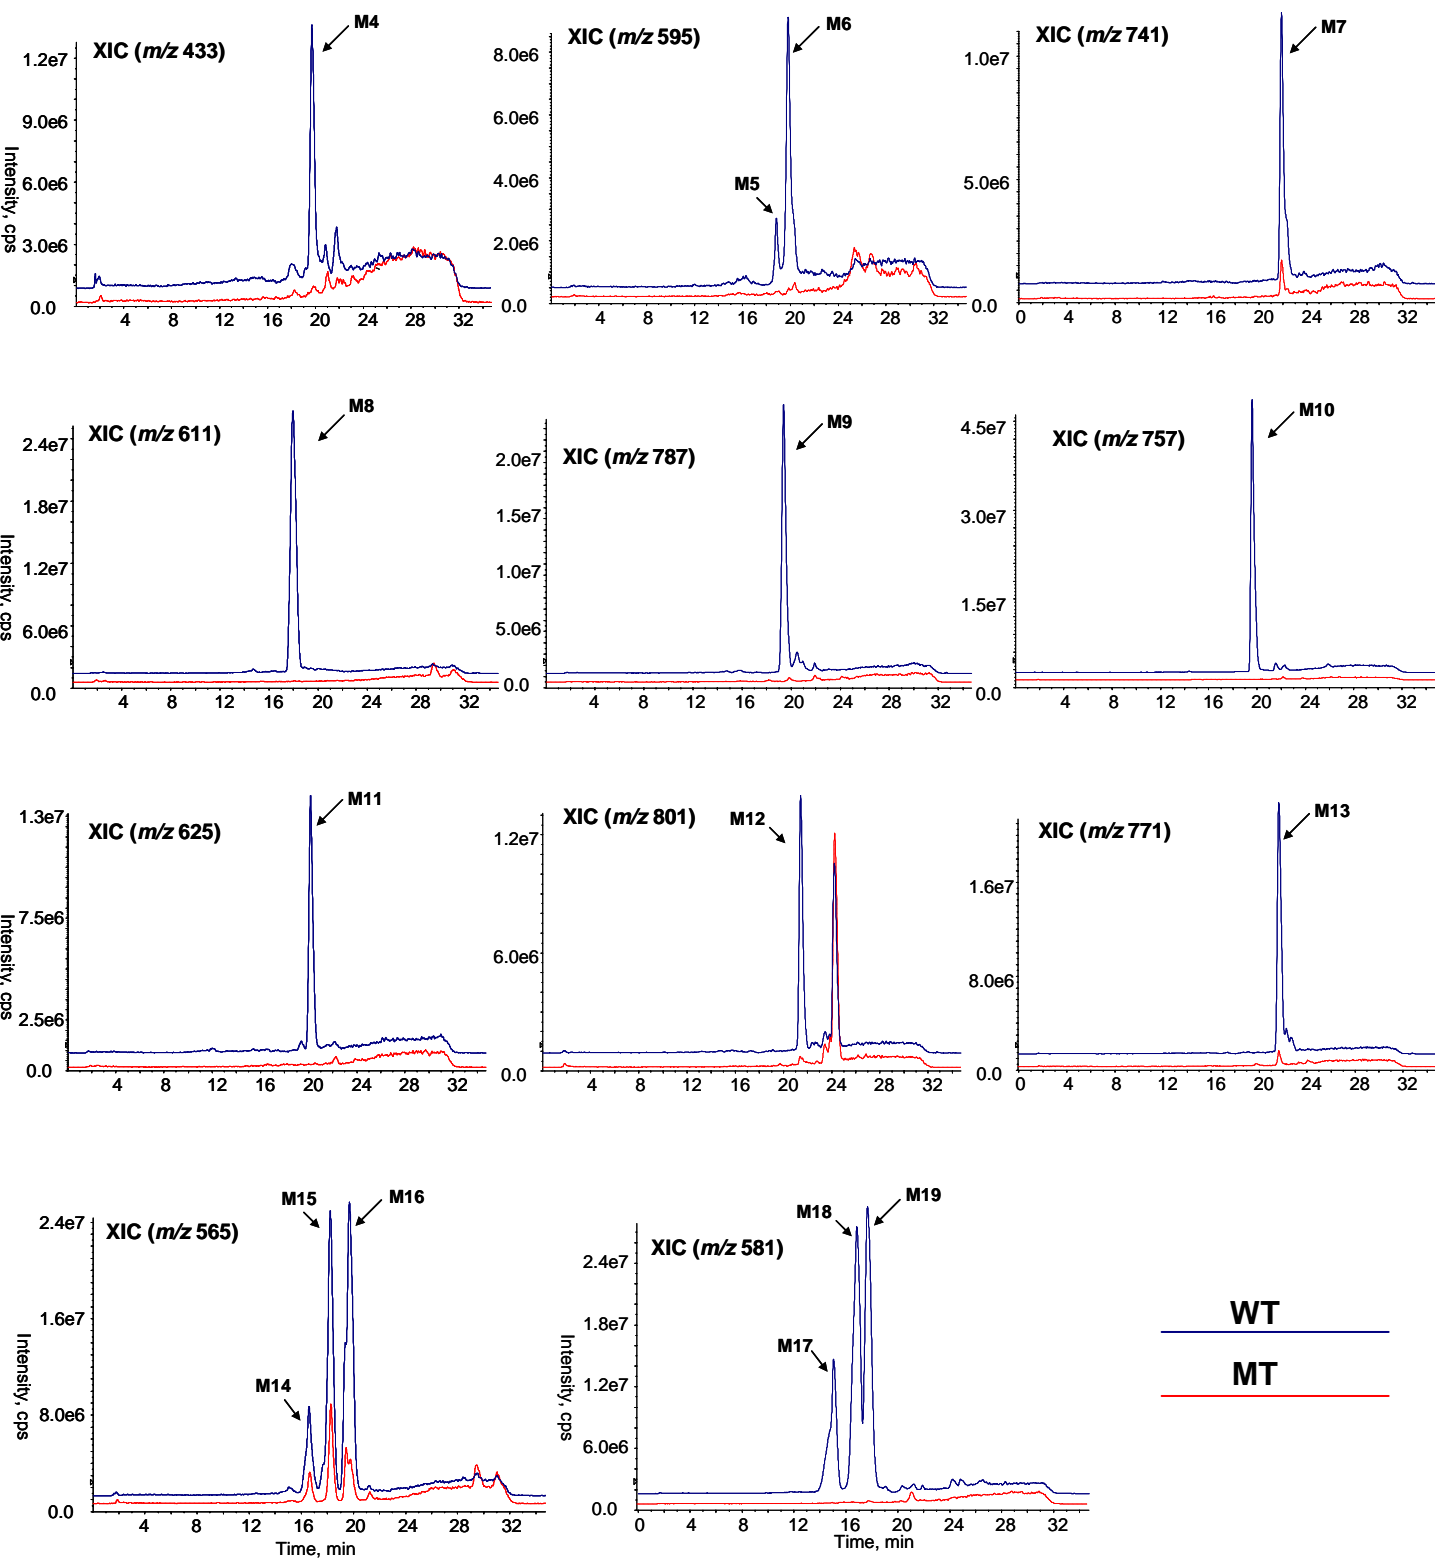

**Fig. S3.** Representative extracted ion chromatograms (XICs) for the C-hexosyl-flavone derivatives (M4 – M19, Table 1) in the rice wild-type (WT) and the CYP93G2 mutant (MT) non-hydrolyzed methanol samples.

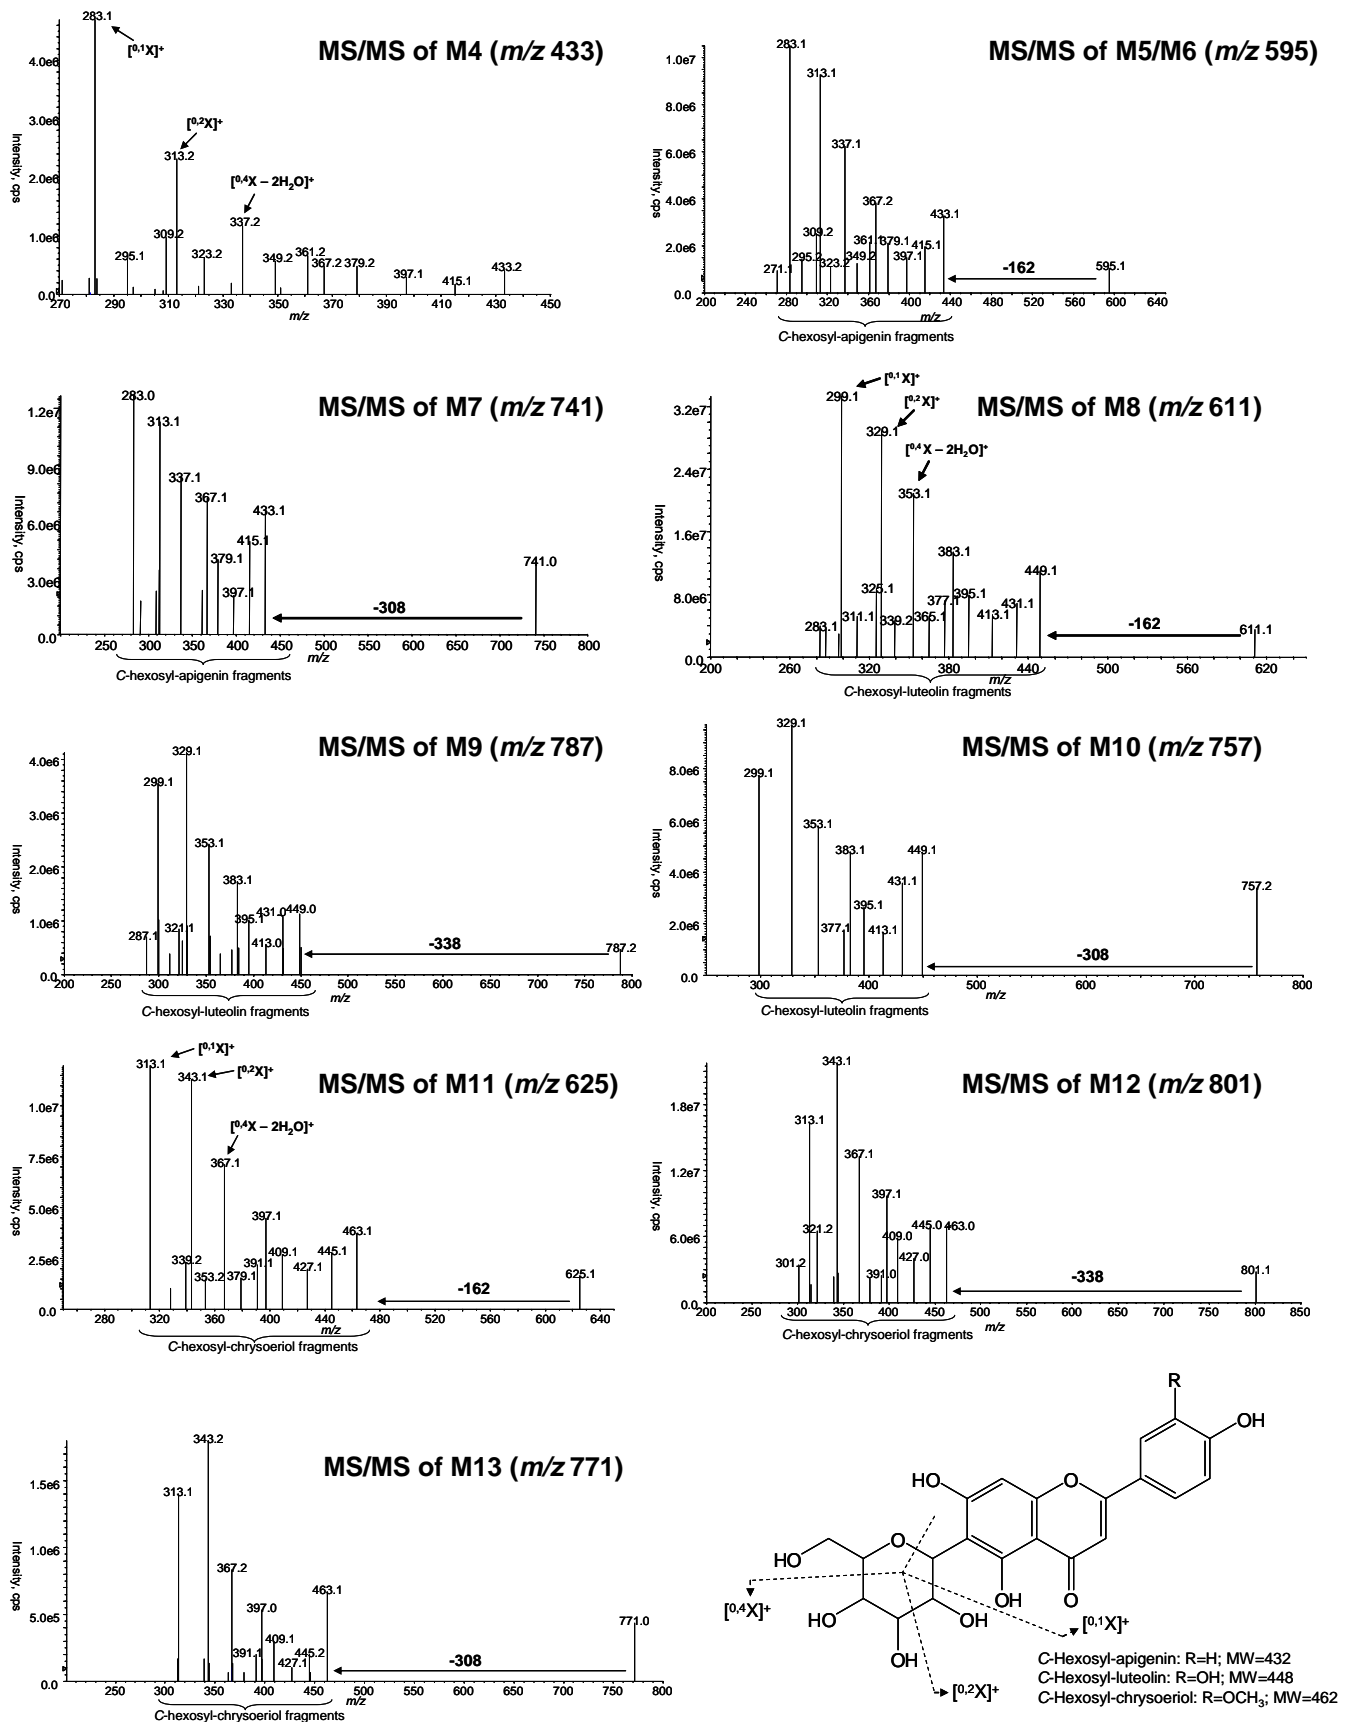

**Fig. S4.** MS/MS spectra for M4-M13 (C-hexosyl-flavone O-glycosylated derivatives). Fragmentation pattern for selected ions observed in the spectra is shown based on the structure of a 6C-hexosyl-flavone.

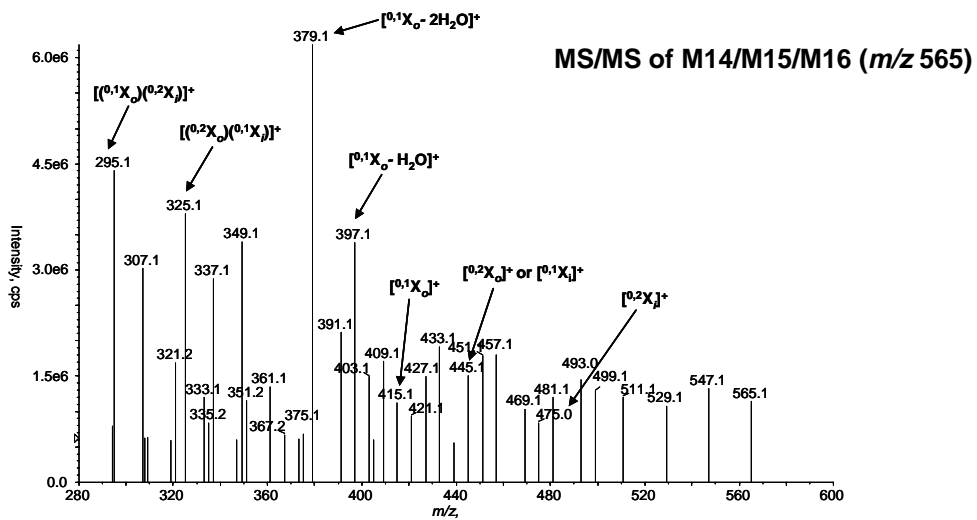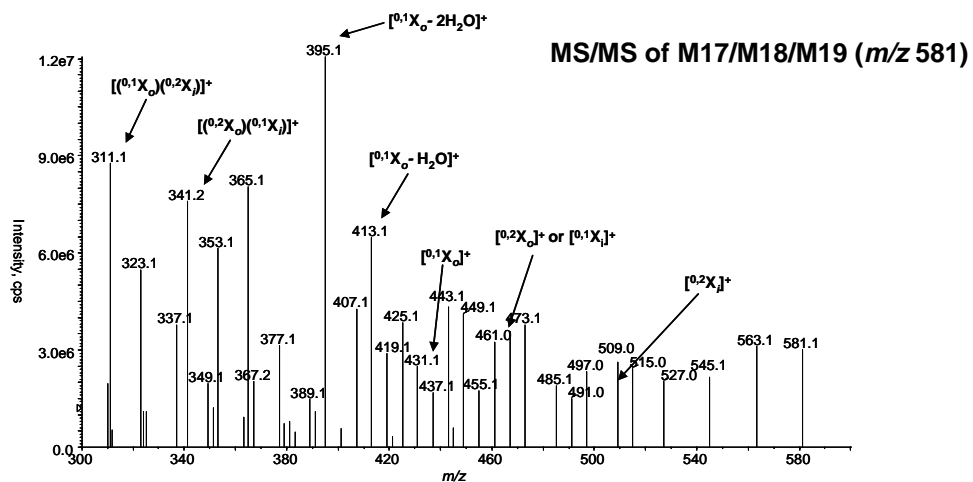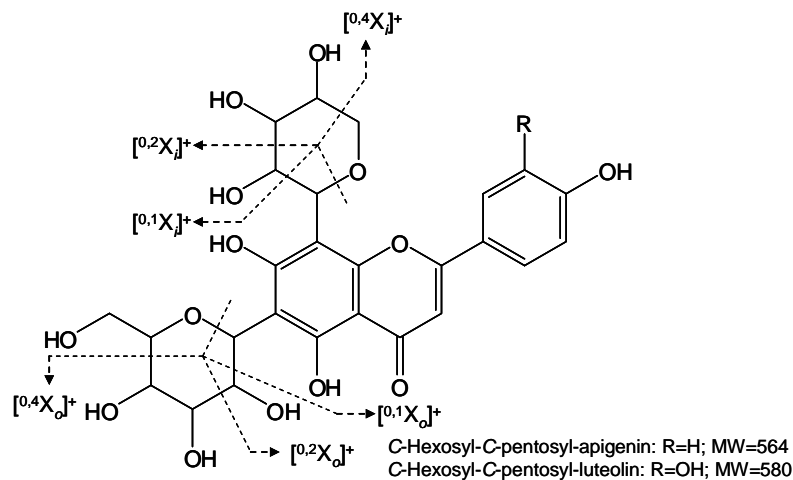

**Fig. S5.** MS/MS spectra and fragmentation patterns for M14 – M19 (C-hexosyl-C-pentosyl flavones). Fragmentation pattern for selected ions observed in the spectra is shown based on the structure of a 6C-hexosyl-8C-pentosyl flavone.

**Table S1.** List of 2-hydroxyflavanone *O*-glycosides identified in *Arabidopsis* overexpressing CYP93G2. Metabolites were identified in non-acid hydrolyzed extracts by LC-MS. The identities of the [2-hydroxyflavanone+H]<sup>+</sup> ions (bold) had been confirmed by their MS<sup>3</sup> spectra

| Precursor ion [M+H] <sup>+</sup> | Retention time (min) | MS/MS ions      | Compound assignment                             |
|----------------------------------|----------------------|-----------------|-------------------------------------------------|
| 613                              | 12.8                 | 451, <b>289</b> | 2-hydroxy-naringenin di- <i>O,O</i> -hexosides  |
| 451                              | 17.1,18.5            | <b>289</b>      | 2-hydroxy-naringenin <i>O</i> -hexosides        |
| 629                              | 12.9                 | 467, <b>305</b> | 2-hydroxy-eriodictyol di- <i>O,O</i> -hexosides |
| 467                              | 16.1, 16.8           | <b>305</b>      | 2-hydroxy-eriodictyol <i>O</i> -hexosides       |

**Table S2.** List of primers used in this study

| Gene    |        | Forward Primer                |        | Reverse Primer                 | Purpose                                                  |
|---------|--------|-------------------------------|--------|--------------------------------|----------------------------------------------------------|
| CYP93G2 | CL543  | 5'-ACTATGGAGGAAGGCGTCGTCGGTG  | CL544  | 5'-GGAGTAGAAGGAAGGGAGCGGTTGG   | Full-length cDNA cloning for yeast expression            |
|         | CL993  | 5'-GCGTCTAGAATGGAGGAAGGCGTCGT | CL994  | 5'-CGCGAGCTCTCAGGAGTAGAAGGAAGG | Full-length cDNA cloning for Arabidopsis over-expression |
|         | CL1216 | 5'-GCTGGAGACCATCATCGAG        | CL1256 | 5'-TGAAGAAGACCTGGGTGTCG        | Genomic PCR and RT-PCR                                   |
| OsCGT   | CL1316 | 5'-GATGGATCCATGCCGAGCTCTG     | CL1317 | 5'-ACCCTCGAGTCAATTAGTGCG       | Full-length cDNA cloning for Arabidopsis over-expression |
|         | CL1329 | 5'-CTCTCCCTCTGCGCCTACTT       | CL1330 | 5'-GATCTTTTGCCTGGTTGCTC        | Genomic PCR and RT-PCR                                   |
